# Supplementary material for: Coordination polymers built with transition metal sulphates and angular 2,5-bis(imidazol-1-yl)thiophene (thim2): synthesis, structure and photoluminescent properties
Source: Royal Society of Chemistry journal article supplement (doi:10.1039/c4ce00691g), 2014-01-01
Supplement: c4ce00691g1.pdf [file c4ce00691g1.pdf]

**Electronic Supplementary Information (ESI)**

**Coordination Polymers Built with Transition Metal Sulphates and  
Angular 2,5-bis(imidazol-1-yl)thiophene (thim<sub>2</sub>): Synthesis,  
Structure and Photoluminescent Properties**

**Namita Singh and Ganapathi Anantharaman\***

Department of Chemistry, Indian Institute of Technology (IIT), Kanpur – 208016, INDIA.

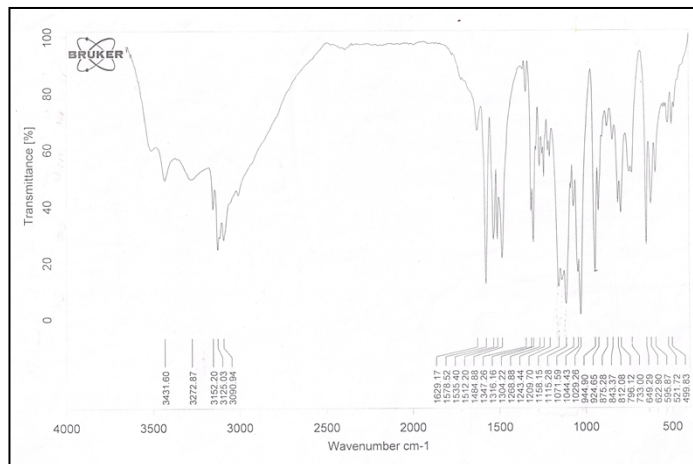

**Figure S1. IR spectrum of 1**

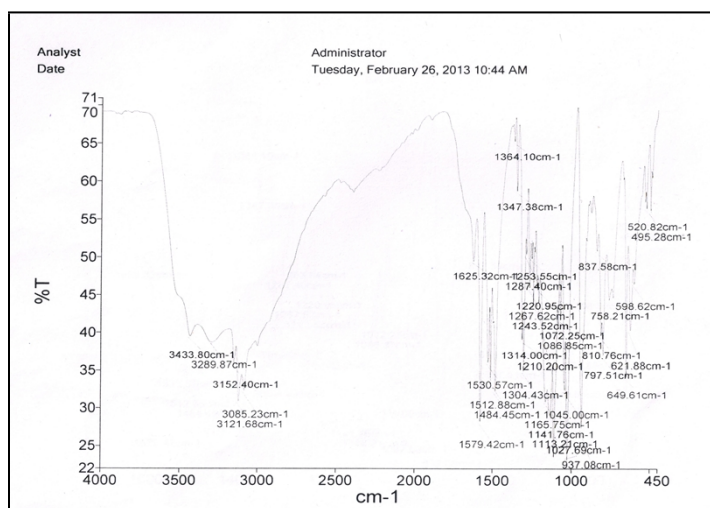

**Figure S2. IR spectrum of 2**

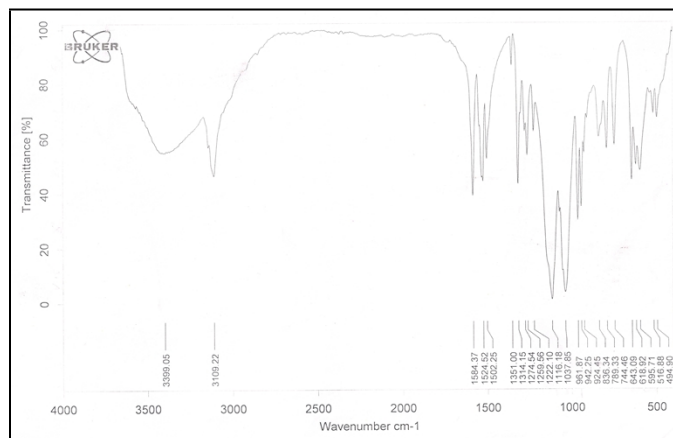

**Figure S3.** IR spectrum of **3**

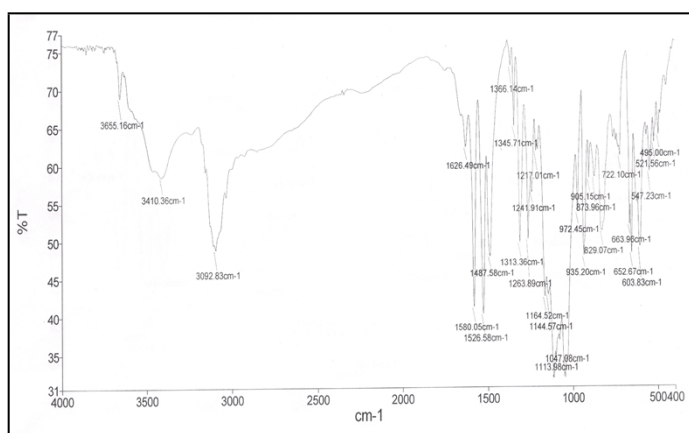

**Figure S4.** IR spectrum of **4**

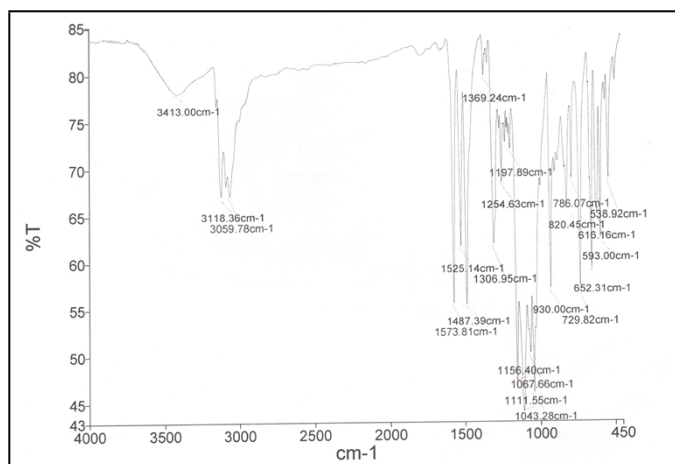

**Figure S5.** IR spectrum of **5**

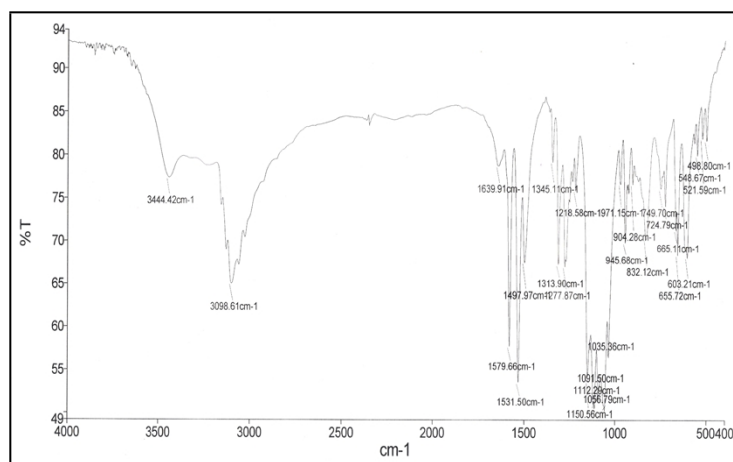

**Figure S6.** IR spectrum of **6**

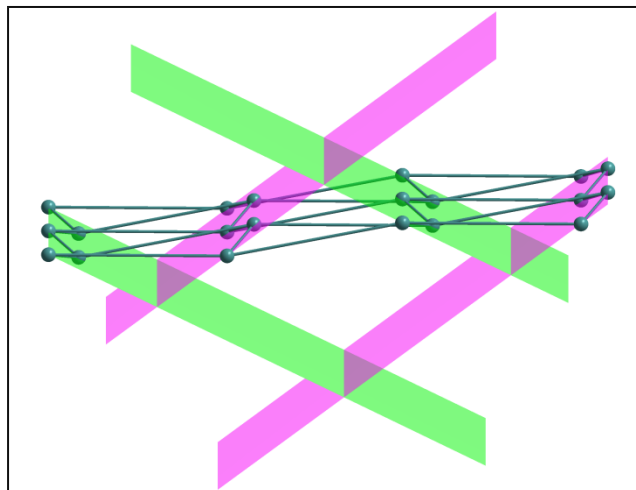

**Figure S7.** Depicted the dihedral angle between adjacent 1D chains in 2D layer of **3**

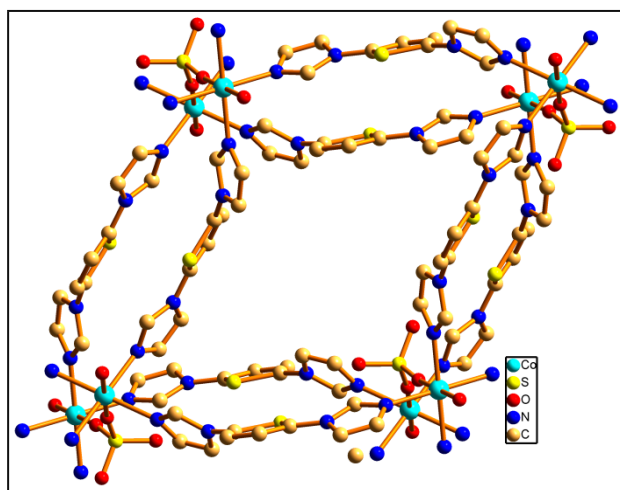

**Figure S8.** Representation of flexible cube in **4**

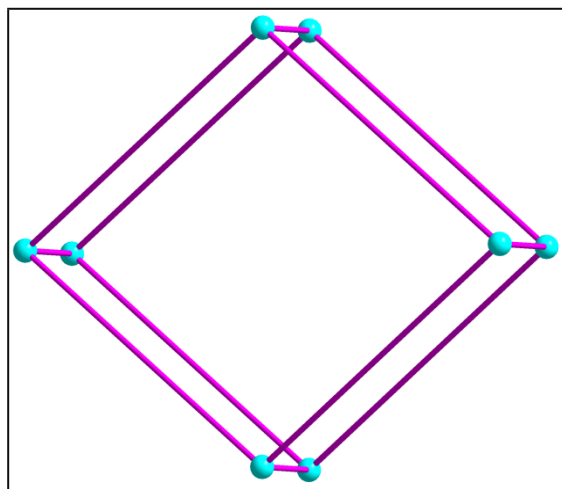

**Figure S9.** Perspective view of cube in **4**

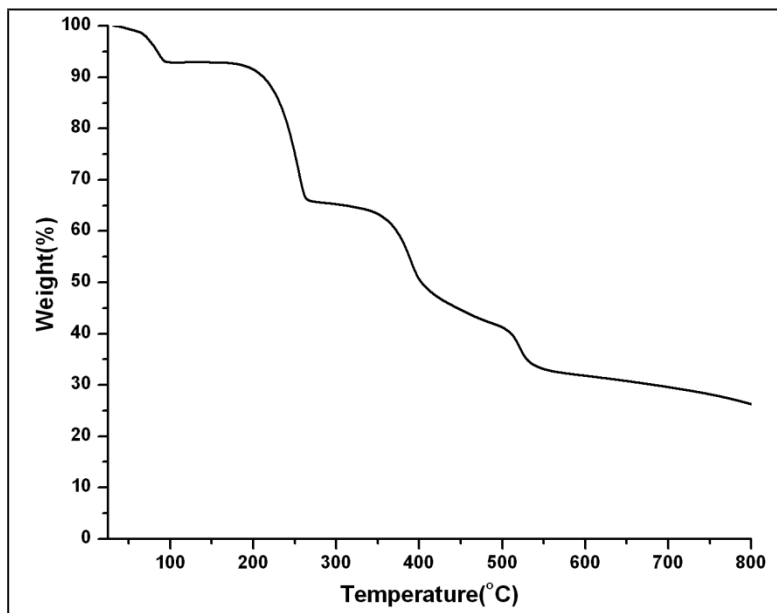

**Figure S10.** Thermogravimetric analysis of **1**.

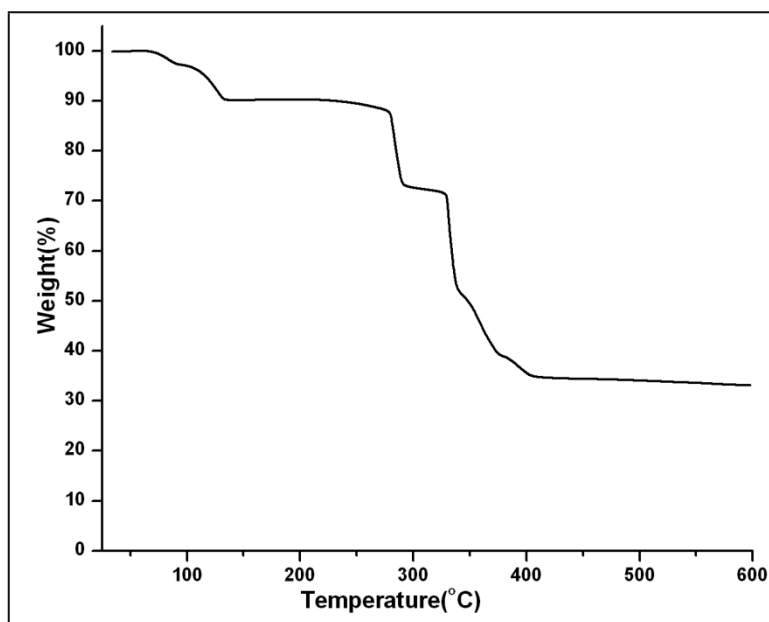

**Figure S11.** Thermogravimetric analysis of **2**.

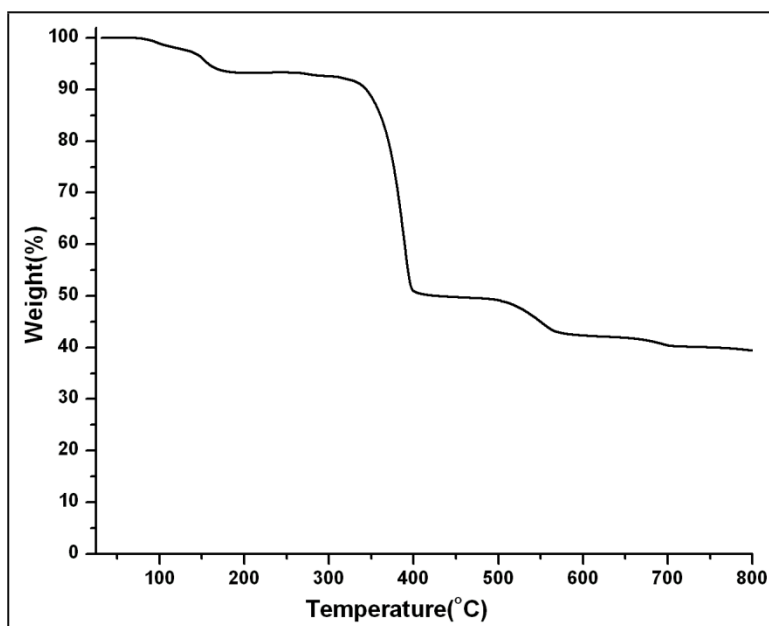

**Figure S12.** Thermogravimetric analysis of **3**.

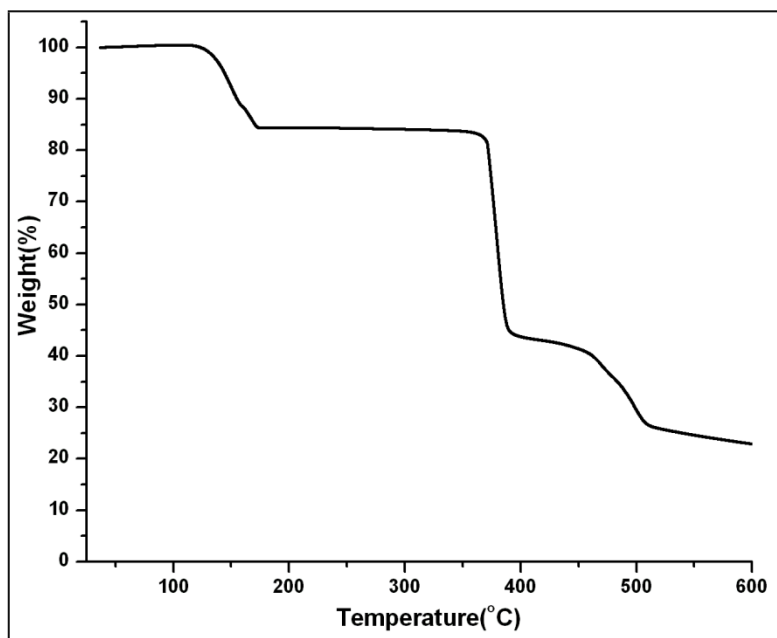

**Figure S13.** Thermogravimetric analysis of **4**.

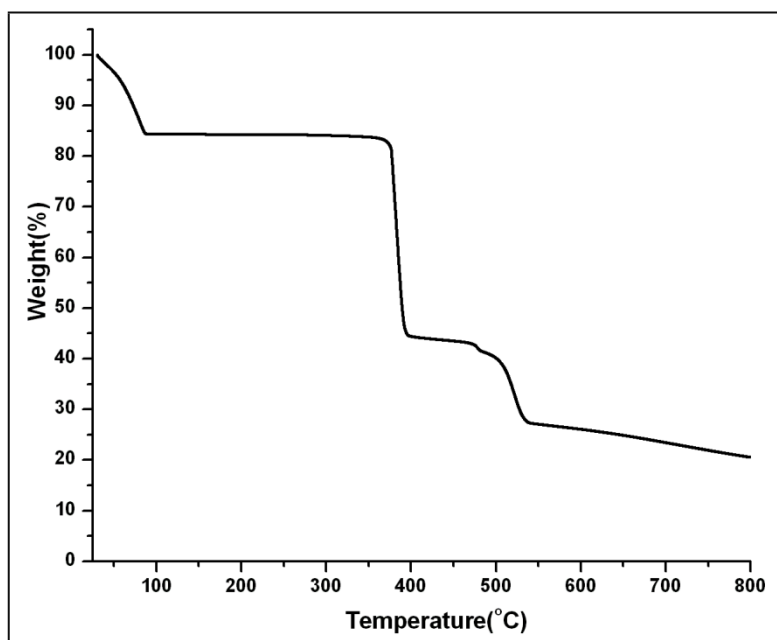

**Figure S14.** Thermogravimetric analysis of **5**.



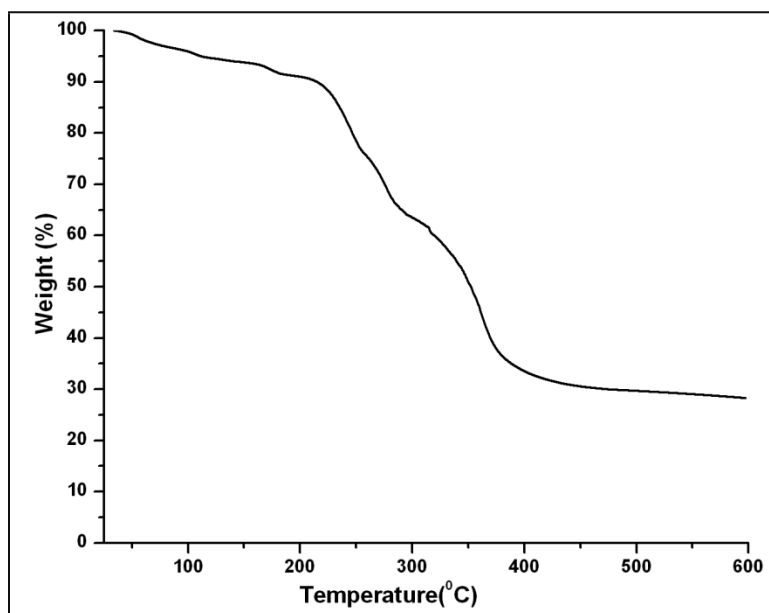

**Figure S15.** Thermogravimetric analysis of **6**.

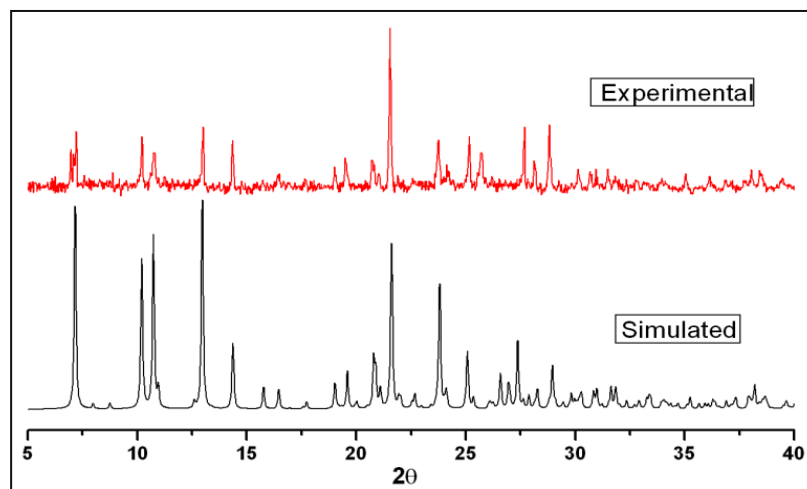

**Figure S16.** PXRD of complex **1**

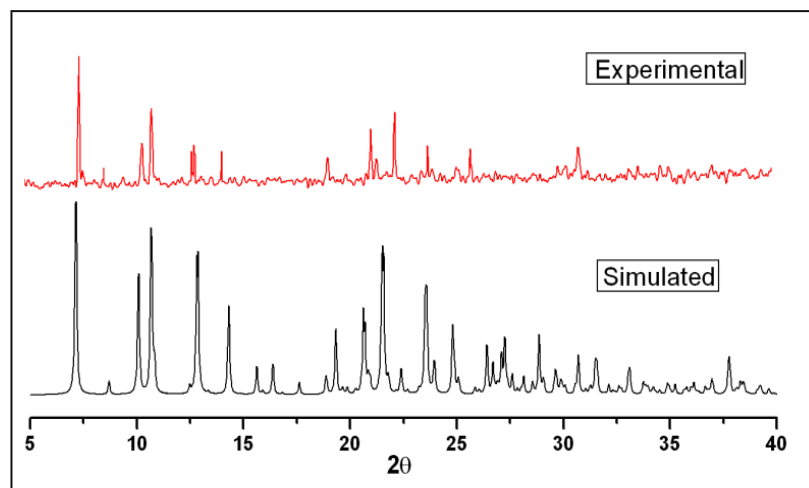

**Figure S17.** PXRD of complex 2

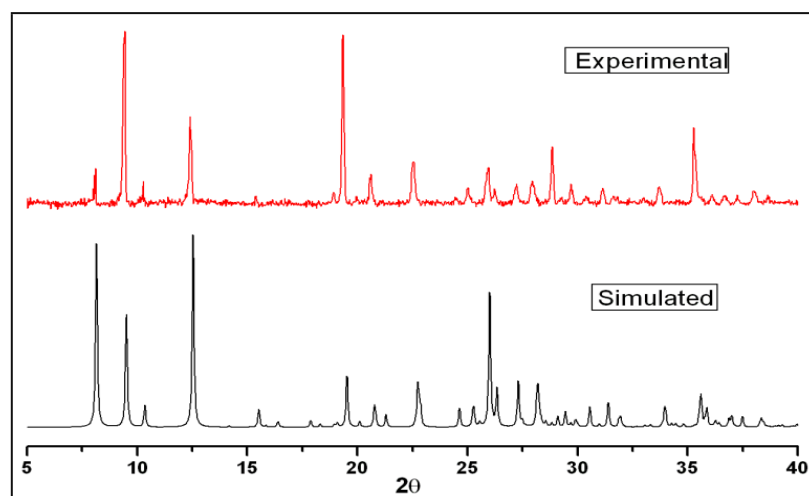

**Figure S18.** PXRD of complex 3

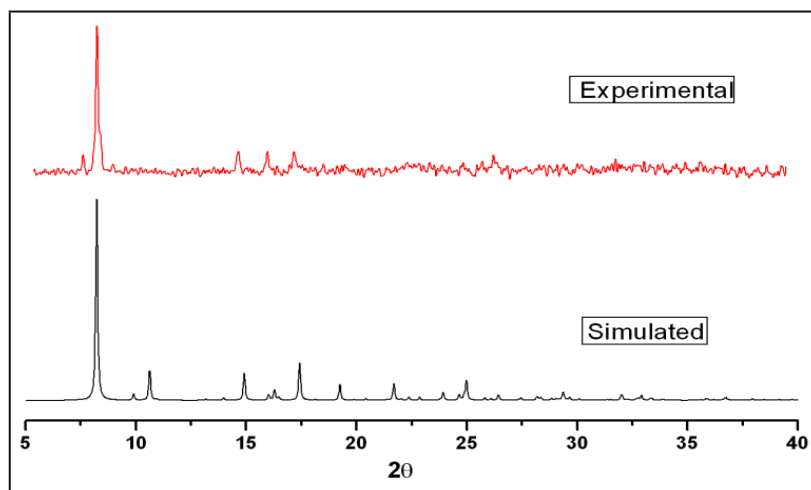

**Figure S19.** PXRD of complex 4

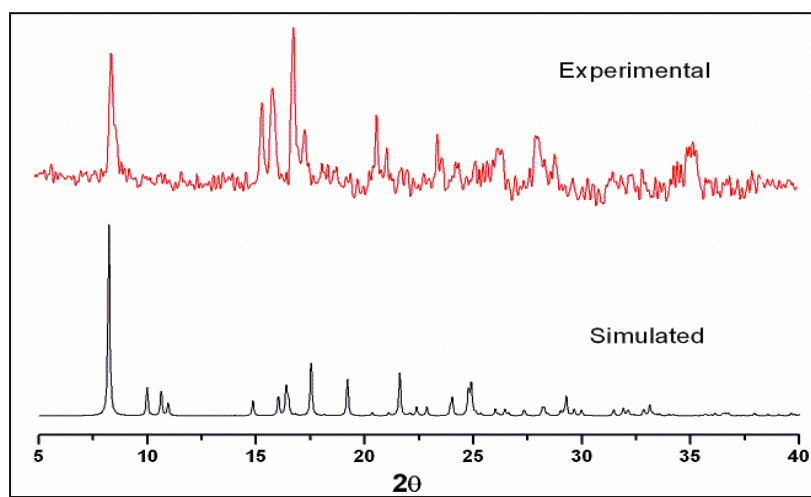

**Figure S20.** PXRD of complex 5

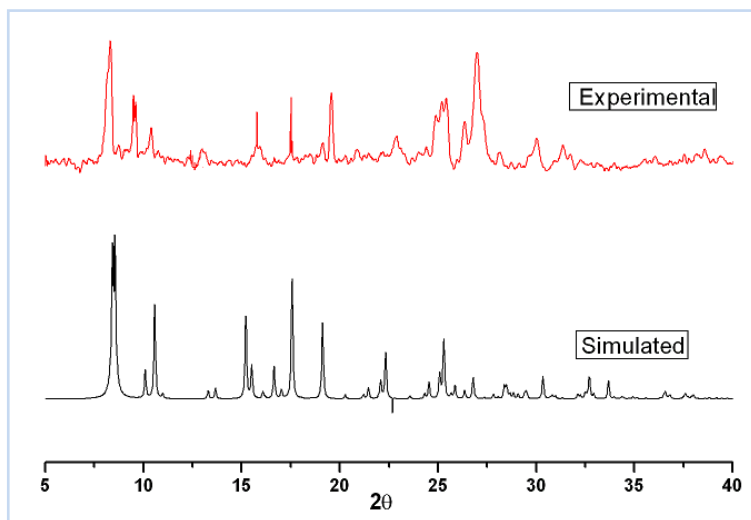

**Figure S21.** PXRD of complex **6**
